# Supplementary material for: TMEM16A, a Homoharringtonine Receptor, as a Potential Endogenic Target for Lung Cancer Treatment
Source: MDPI journal article supplement (doi:10.3390/ijms222010930), 2021-10-10
Supplement: s1 [file s1]

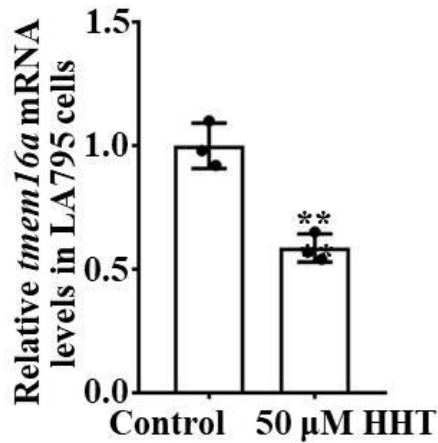

Supporting Data Figure S1. The relative *tmem16a* mRNA levels in LA795 cells treated with 50  $\mu$ M HHT for 24 h ( $n = 3$ ).

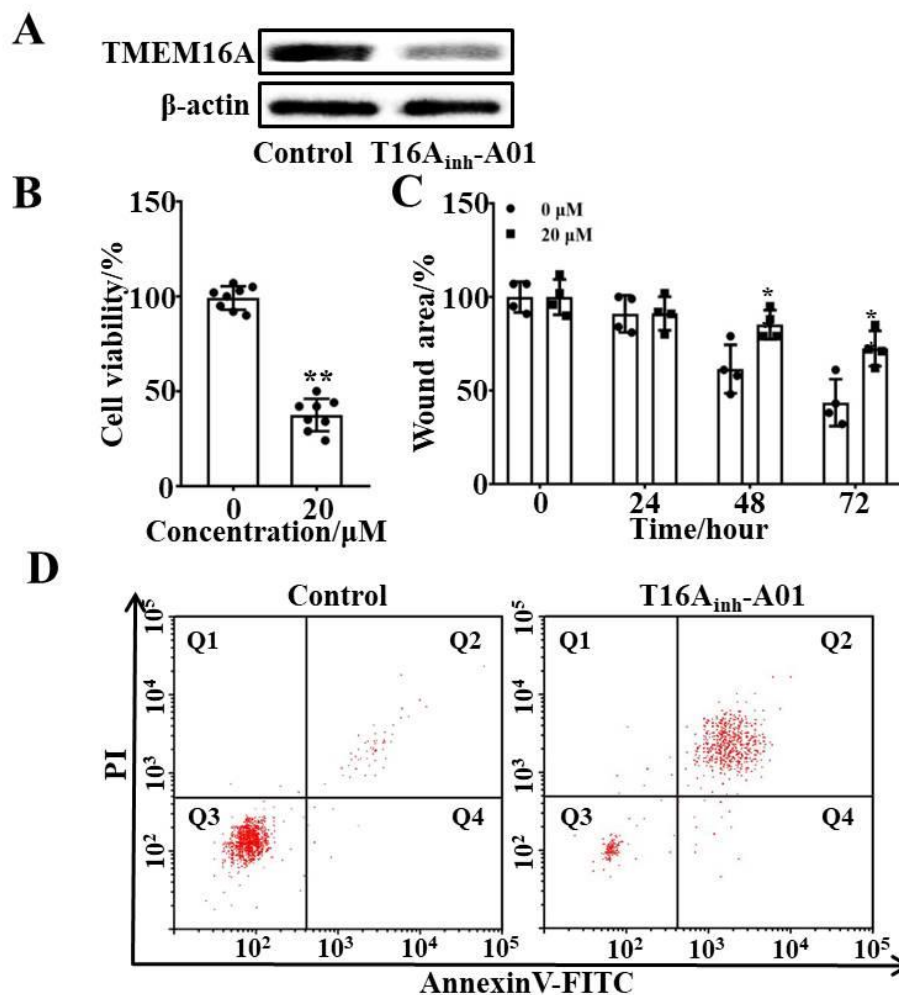

Supporting Data Figure S2. T16A<sub>inh</sub>-A01 inhibited the proliferation and migration of LA795 cells and promoted apoptosis. (A) Expression of TMEM16A in 20  $\mu$ M T16A<sub>inh</sub>-A01 incubated LA795 cells ( $n = 3$ ). (B) Inhibitory effect of T16A<sub>inh</sub>-A01 to the proliferation of LA795 cells ( $n = 8$ ). (C) Inhibitory effect of T16A<sub>inh</sub>-A01 to the migration of LA795 cells ( $n=4$ ). (D) Cell apoptosis results of LA795 cells incubated by 20  $\mu$ M T16A<sub>inh</sub>-A01 for 24 hours detected with Annexin-V assay ( $n = 3$ ).
